# Supplementary material
Source: publisher figshare collection journal article supplement (https://frontiersin.figshare.com/ndownloader/files/13276883)

## **Supplementary material**

**Response of the bacterial communities associated with maize rhizosphere to poultry litter as an organomineral fertilizer**

Vollú et al.

Frontiers in Environmental Science – section: Soil Processes

Research Topic: Microbe-Mediated Processes in Soils

**Figure S1.** Non-metric multidimensional scaling (NMDS) ordination diagram based on the OTU-generated matrices obtained after sequencing using primers for the 16S rRNA-coding gene. Taxonomic groups representing less than (A, B, C) and more than (D, E, F) 3% of the relative abundance were analyzed separately. A and D – all samples analyzed together, B and E – samples taken 60 days after sowing maize, and C and F – samples taken 90 days after sowing maize.

\*, Bulk soil; ×, 0\_P2O5; □, 130kg\_STP\_PL; ■, 260kg\_STP\_PL; △, 130kg\_BAY\_PL; ▲, 260kg\_BAY\_PL; ○, 130kg\_STP; ●, 260kg\_STP; blue and red colours represent samples taken 60 and 90 days after sowing maize, respectively.

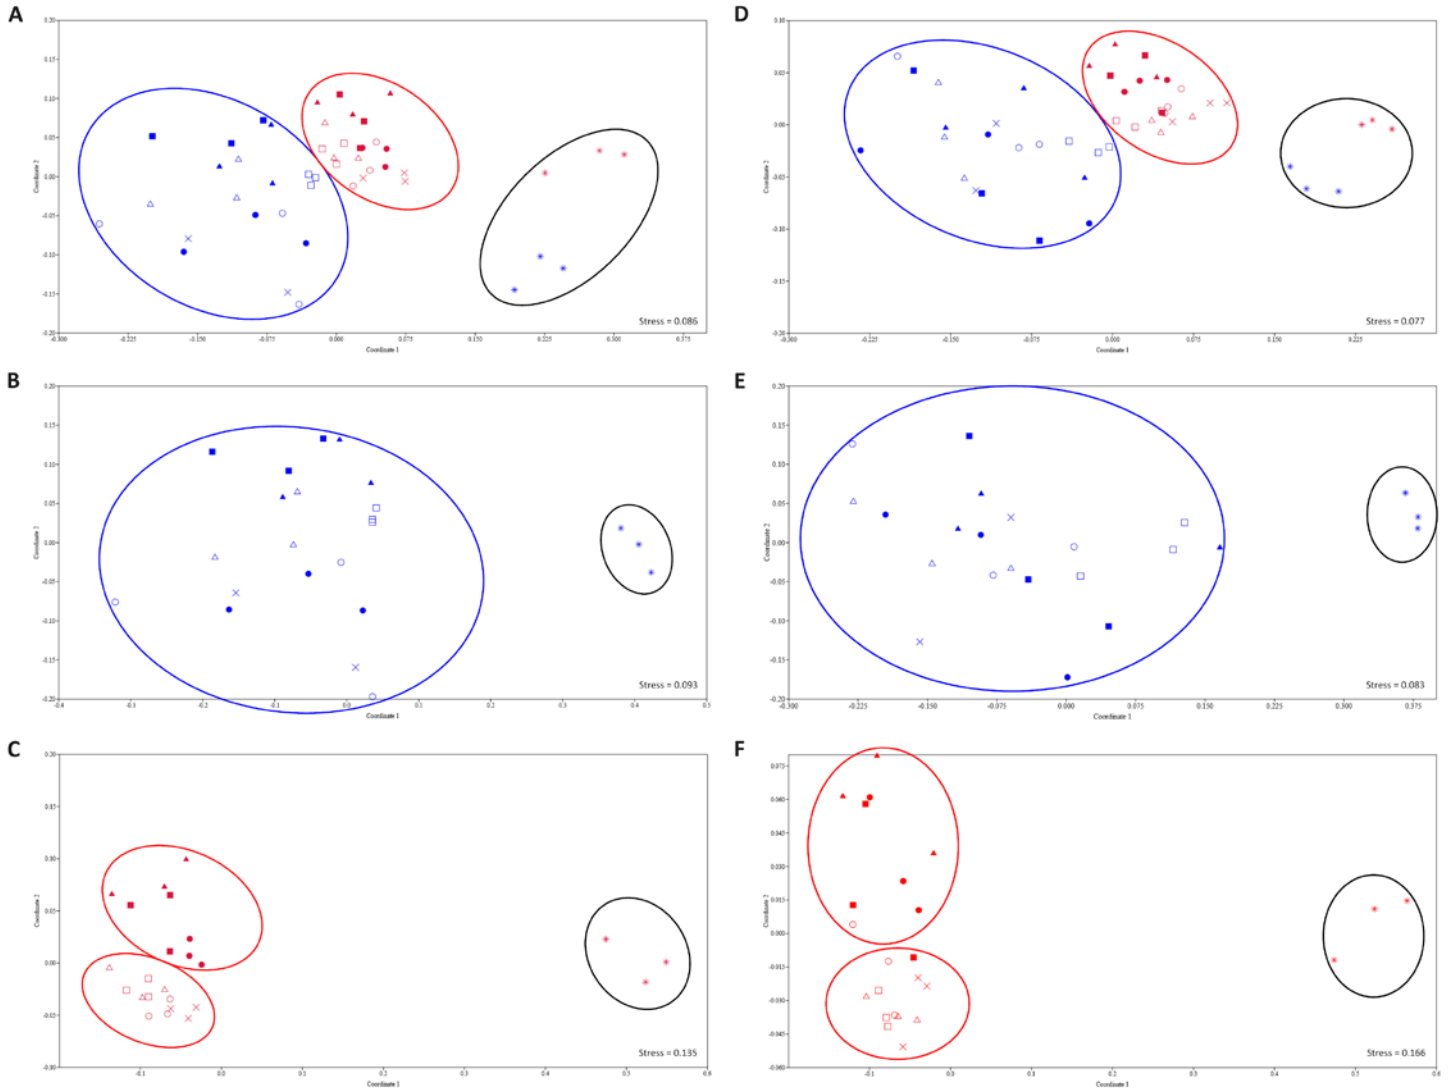

**Figure S2.** Correlation between phosphatase activity and *phoD* gene abundance determined by a linear regression using the R project for Statistical Computing (R core team, 2013). A - Phosphatase activity at pH 6.5, and B - Phosphatase activity at pH 11.

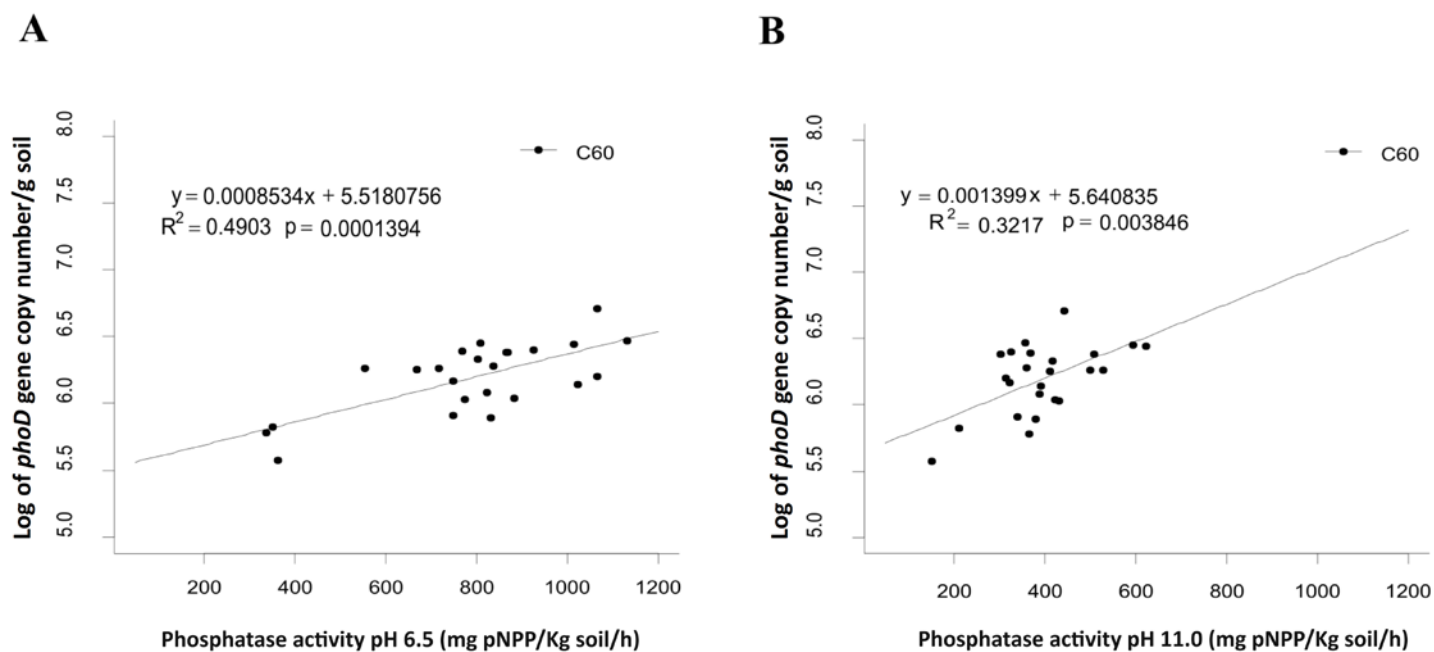

Supplement: Supplementary file 1 [file 13276883]
